# Supplementary material for: Environmental quality standards for diclofenac derived under the European Water Framework Directive: 3. Marine ecotoxicity
Source: Research Square preprint supplement (doi:10.21203/rs.3.rs-6295199/v1), 2025-04-18
Supplement: Supplementary file 1 [file 06946f236c3905decce8e22d.xlsx]

## Sheet: Data
Country	Location	Date	Type of water	Sampling type	Result (ng/L)	LoD (ng/L)	Risk Characterisation Ratio (RCR)						Comments	Reference
							Scenario 1a			Scenario 2b
							4 ng/L	37 ng/L	58 ng/L	4 ng/L	37 ng/L	58 ng/L
Baltic Sea; Sweden	Mellanfjärden	N.R.	Receiving Marine water	Grab	2	N.R.	0.5	0.0540541	0.0344828	0.5	0.0540541	0.0344828		Hallgren P and Wallberg P. 2015.
Baltic Sea; Germany	Wismarbucht	N.R.	Receiving Marine water	Grab	54	N.R.	13.5	1.45946	0.931034	13.5	1.45946	0.931034		Hallgren P and Wallberg P. 2015.
Baltic Sea; Germany	Arkonasee	N.R.	Receiving Marine water	Grab	40	N.R.	10	1.08108	0.689655	10	1.08108	0.689655		Hallgren P and Wallberg P. 2015.
Baltic Sea; Germany	AL365_46,0005LA	N.R.	Receiving Marine water	Grab	27.1	N.R.	6.775	0.732432	0.467241	6.775	0.732432	0.467241		Hallgren P and Wallberg P. 2015.
Baltic Sea; Germany	Wismarbucht	N.R.	Receiving Marine water	Grab	14	N.R.	3.5	0.378378	0.241379	3.5	0.378378	0.241379		Hallgren P and Wallberg P. 2015.
Baltic Sea; Germany	AL365_ODER,0005LA	N.R.	Receiving Marine water	Grab	13.4	N.R.	3.35	0.362162	0.231034	3.35	0.362162	0.231034		Hallgren P and Wallberg P. 2015.
Baltic Sea; Germany	Strelasund	N.R.	Receiving Marine water	Grab	13	N.R.	3.25	0.351351	0.224138	3.25	0.351351	0.224138		Hallgren P and Wallberg P. 2015.
Baltic Sea; Germany	MM0803_57,0006LA	N.R.	Receiving Marine water	Grab	3.3	N.R.	0.825	0.0891892	0.0568966	0.825	0.0891892	0.0568966		Hallgren P and Wallberg P. 2015.
Baltic Sea; Germany	HE316_10,0004LA	N.R.	Receiving Marine water	Grab	2.8	N.R.	0.7	0.0756757	0.0482759	0.7	0.0756757	0.0482759		Hallgren P and Wallberg P. 2015.
Baltic Sea; Germany	AL385B_ODER,0004LA	N.R.	Receiving Marine water	Grab	2	N.R.	0.5	0.0540541	0.0344828	0.5	0.0540541	0.0344828		Hallgren P and Wallberg P. 2015.
Baltic Sea; Germany	AL430_ODER,0004LA	N.R.	Receiving Marine water	Grab	1.5	N.R.	0.375	0.0405405	0.0258621	0.375	0.0405405	0.0258621		Hallgren P and Wallberg P. 2015.
Baltic Sea; Germany	HE316_113,0004LA	N.R.	Receiving Marine water	Grab	1.2	N.R.	0.3	0.0324324	0.0206897	0.3	0.0324324	0.0206897		Hallgren P and Wallberg P. 2015.
Baltic Sea; Germany	AL331_109,0004LA	N.R.	Receiving Marine water	Grab	0.7	N.R.	0.175	0.0189189	0.012069	0.175	0.0189189	0.012069		Hallgren P and Wallberg P. 2015.
Baltic Sea; Germany	AL365_360,0005LA	N.R.	Receiving Marine water	Grab	0.7	N.R.	0.175	0.0189189	0.012069	0.175	0.0189189	0.012069		Hallgren P and Wallberg P. 2015.
Baltic Sea; Germany	AL407A_360,0004LA	N.R.	Receiving Marine water	Grab	0.6	N.R.	0.15	0.0162162	0.0103448	0.15	0.0162162	0.0103448		Hallgren P and Wallberg P. 2015.
Baltic Sea; Germany	AL331_360,0004LA	N.R.	Receiving Marine water	Grab	0.5	N.R.	0.125	0.0135135	0.00862069	0.125	0.0135135	0.00862069		Hallgren P and Wallberg P. 2015.
Baltic Sea; Germany	AL407A_10,0004LA	N.R.	Receiving Marine water	Grab	0.5	N.R.	0.125	0.0135135	0.00862069	0.125	0.0135135	0.00862069		Hallgren P and Wallberg P. 2015.
Baltic Sea; Germany	AL365_30,0005LA	N.R.	Receiving Marine water	Grab	0.5	N.R.	0.125	0.0135135	0.00862069	0.125	0.0135135	0.00862069		Hallgren P and Wallberg P. 2015.
Baltic Sea; Germany	AL331_46,0004LA	N.R.	Receiving Marine water	Grab	0.4	N.R.	0.1	0.0108108	0.00689655	0.1	0.0108108	0.00689655		Hallgren P and Wallberg P. 2015.
Baltic Sea; Germany	AL407A_46,0004LA	N.R.	Receiving Marine water	Grab	0.4	N.R.	0.1	0.0108108	0.00689655	0.1	0.0108108	0.00689655		Hallgren P and Wallberg P. 2015.
Baltic Sea; Germany	AL365_12,0005LA	N.R.	Receiving Marine water	Grab	0.3	N.R.	0.075	0.00810811	0.00517241	0.075	0.00810811	0.00517241		Hallgren P and Wallberg P. 2015.
Baltic Sea; Germany	AL407A_12,0004LA	N.R.	Receiving Marine water	Grab	0.3	N.R.	0.075	0.00810811	0.00517241	0.075	0.00810811	0.00517241		Hallgren P and Wallberg P. 2015.
Baltic Sea; Germany	AL365_10,0005LA	N.R.	Receiving Marine water	Grab	0.3	N.R.	0.075	0.00810811	0.00517241	0.075	0.00810811	0.00517241		Hallgren P and Wallberg P. 2015.
Baltic Sea; Germany	HE316_360,0004LA	N.R.	Receiving Marine water	Grab	0.3	N.R.	0.075	0.00810811	0.00517241	0.075	0.00810811	0.00517241		Hallgren P and Wallberg P. 2015.
Baltic Sea; Germany	HE316_152,0004LA	N.R.	Receiving Marine water	Grab	0.3	N.R.	0.075	0.00810811	0.00517241	0.075	0.00810811	0.00517241		Hallgren P and Wallberg P. 2015.
Baltic Sea; Germany	AL430_113,0004LA	N.R.	Receiving Marine water	Grab	0.3	N.R.	0.075	0.00810811	0.00517241	0.075	0.00810811	0.00517241		Hallgren P and Wallberg P. 2015.
Baltic Sea; Germany	AL407A_152,0004LA	N.R.	Receiving Marine water	Grab	0.2	N.R.	0.05	0.00540541	0.00344828	0.05	0.00540541	0.00344828		Hallgren P and Wallberg P. 2015.
Baltic Sea; Germany	AL385B_152,0004LA	N.R.	Receiving Marine water	Grab	0.2	N.R.	0.05	0.00540541	0.00344828	0.05	0.00540541	0.00344828		Hallgren P and Wallberg P. 2015.
Baltic Sea; Germany	AL430_12,0004LA	N.R.	Receiving Marine water	Grab	0.2	N.R.	0.05	0.00540541	0.00344828	0.05	0.00540541	0.00344828		Hallgren P and Wallberg P. 2015.
Baltic Sea; Germany	AL430_360,0004LA	N.R.	Receiving Marine water	Grab	0.2	N.R.	0.05	0.00540541	0.00344828	0.05	0.00540541	0.00344828		Hallgren P and Wallberg P. 2015.
Baltic Sea; Germany	AL407A_113,0004LA	N.R.	Receiving Marine water	Grab	0.2	N.R.	0.05	0.00540541	0.00344828	0.05	0.00540541	0.00344828		Hallgren P and Wallberg P. 2015.
Baltic Sea; Germany	AL385B_360,0004LA	N.R.	Receiving Marine water	Grab	0.2	N.R.	0.05	0.00540541	0.00344828	0.05	0.00540541	0.00344828		Hallgren P and Wallberg P. 2015.
Baltic Sea; Germany	HE316_46,0004LA	N.R.	Receiving Marine water	Grab	0.2	N.R.	0.05	0.00540541	0.00344828	0.05	0.00540541	0.00344828		Hallgren P and Wallberg P. 2015.
Baltic Sea; Germany	AL331_113,0004LA	N.R.	Receiving Marine water	Grab	0.2	N.R.	0.05	0.00540541	0.00344828	0.05	0.00540541	0.00344828		Hallgren P and Wallberg P. 2015.
Baltic Sea; Germany	AL331_10,0004LA	N.R.	Receiving Marine water	Grab	0.2	N.R.	0.05	0.00540541	0.00344828	0.05	0.00540541	0.00344828		Hallgren P and Wallberg P. 2015.
Baltic Sea; Germany	AL365_109,0005LA	N.R.	Receiving Marine water	Grab	0.1	N.R.	0.025	0.0027027	0.00172414	0.025	0.0027027	0.00172414		Hallgren P and Wallberg P. 2015.
Baltic Sea; Germany	AL331_12,0004LA	N.R.	Receiving Marine water	Grab	0.1	N.R.	0.025	0.0027027	0.00172414	0.025	0.0027027	0.00172414		Hallgren P and Wallberg P. 2015.
Baltic Sea; Germany	AL385B_12,0004LA	N.R.	Receiving Marine water	Grab	0.1	N.R.	0.025	0.0027027	0.00172414	0.025	0.0027027	0.00172414		Hallgren P and Wallberg P. 2015.
Baltic Sea; Germany	AL430_46,0004LA	N.R.	Receiving Marine water	Grab	0.1	N.R.	0.025	0.0027027	0.00172414	0.025	0.0027027	0.00172414		Hallgren P and Wallberg P. 2015.
Baltic Sea; Germany	AL385B_10,0004LA	N.R.	Receiving Marine water	Grab	0.1	N.R.	0.025	0.0027027	0.00172414	0.025	0.0027027	0.00172414		Hallgren P and Wallberg P. 2015.
Baltic Sea; Germany	HE316_109,0004LA	N.R.	Receiving Marine water	Grab	0.1	N.R.	0.025	0.0027027	0.00172414	0.025	0.0027027	0.00172414		Hallgren P and Wallberg P. 2015.
Baltic Sea; Germany	AL430_10,0004LA	N.R.	Receiving Marine water	Grab	0.1	N.R.	0.025	0.0027027	0.00172414	0.025	0.0027027	0.00172414		Hallgren P and Wallberg P. 2015.
Baltic Sea; Germany	AL430_109,0004LA	N.R.	Receiving Marine water	Grab	0.1	N.R.	0.025	0.0027027	0.00172414	0.025	0.0027027	0.00172414		Hallgren P and Wallberg P. 2015.
Baltic Sea; Germany	AL365_152,0005LA	N.R.	Receiving Marine water	Grab	0.1	N.R.	0.025	0.0027027	0.00172414	0.025	0.0027027	0.00172414		Hallgren P and Wallberg P. 2015.
Baltic Sea; Germany	AL430_152,0004LA	N.R.	Receiving Marine water	Grab	0.1	N.R.	0.025	0.0027027	0.00172414	0.025	0.0027027	0.00172414		Hallgren P and Wallberg P. 2015.
Baltic Sea; Germany	AL365_113,0005LA	N.R.	Receiving Marine water	Grab	0.1	N.R.	0.025	0.0027027	0.00172414	0.025	0.0027027	0.00172414		Hallgren P and Wallberg P. 2015.
Baltic Sea; Germany	HE316_12,0004LA	N.R.	Receiving Marine water	Grab	0.1	N.R.	0.025	0.0027027	0.00172414	0.025	0.0027027	0.00172414		Hallgren P and Wallberg P. 2015.
Baltic Sea; Germany	AL385B_30,0004LA	N.R.	Receiving Marine water	Grab	0.1	N.R.	0.025	0.0027027	0.00172414	0.025	0.0027027	0.00172414		Hallgren P and Wallberg P. 2015.
Baltic Sea; Germany	AL407A_30,0004LA	N.R.	Receiving Marine water	Grab	0.1	N.R.	0.025	0.0027027	0.00172414	0.025	0.0027027	0.00172414		Hallgren P and Wallberg P. 2015.
Baltic Sea; Germany	AL385B_113,0004LA	N.R.	Receiving Marine water	Grab	0.1	N.R.	0.025	0.0027027	0.00172414	0.025	0.0027027	0.00172414		Hallgren P and Wallberg P. 2015.
Baltic Sea; Germany	MM0803_63,0006LA	N.R.	Receiving Marine water	Grab	0.1	N.R.	0.025	0.0027027	0.00172414	0.025	0.0027027	0.00172414		Hallgren P and Wallberg P. 2015.
Baltic Sea; Germany	MM0803_55,0006LA	N.R.	Receiving Marine water	Grab	0.1	N.R.	0.025	0.0027027	0.00172414	0.025	0.0027027	0.00172414		Hallgren P and Wallberg P. 2015.
Baltic Sea; Germany	AL331_30,0004LA	N.R.	Receiving Marine water	Grab	0.1	N.R.	0.025	0.0027027	0.00172414	0.025	0.0027027	0.00172414		Hallgren P and Wallberg P. 2015.
Baltic Sea; Germany	AL430_30,0004LA	N.R.	Receiving Marine water	Grab	0.1	N.R.	0.025	0.0027027	0.00172414	0.025	0.0027027	0.00172414		Hallgren P and Wallberg P. 2015.
Baltic Sea; Germany	HE316_30,0004LA	N.R.	Receiving Marine water	Grab	0.1	N.R.	0.025	0.0027027	0.00172414	0.025	0.0027027	0.00172414		Hallgren P and Wallberg P. 2015.
Baltic Sea; Germany	MM0803_271,0006LA	N.R.	Receiving Marine water	Grab	0.1	N.R.	0.025	0.0027027	0.00172414	0.025	0.0027027	0.00172414		Hallgren P and Wallberg P. 2015.
Baltic Sea; Germany	AL385B_46,0004LA	N.R.	Receiving Marine water	Grab	0.1	N.R.	0.025	0.0027027	0.00172414	0.025	0.0027027	0.00172414		Hallgren P and Wallberg P. 2015.
Baltic Sea; Germany	AL407A_109,0004LA	N.R.	Receiving Marine water	Grab	0.1	N.R.	0.025	0.0027027	0.00172414	0.025	0.0027027	0.00172414		Hallgren P and Wallberg P. 2015.
Baltic Sea; Germany	MM0803_52,0006LA	N.R.	Receiving Marine water	Grab	0.1	N.R.	0.025	0.0027027	0.00172414	0.025	0.0027027	0.00172414		Hallgren P and Wallberg P. 2015.
Baltic Sea; Germany	MM0803_64,0006LA	N.R.	Receiving Marine water	Grab	0.1	N.R.	0.025	0.0027027	0.00172414	0.025	0.0027027	0.00172414		Hallgren P and Wallberg P. 2015.
Baltic Sea; Germany	MM0803_65,0006LA	N.R.	Receiving Marine water	Grab	0.1	N.R.	0.025	0.0027027	0.00172414	0.025	0.0027027	0.00172414		Hallgren P and Wallberg P. 2015.
Baltic Sea; Germany	AL385B_109,0004LA	N.R.	Receiving Marine water	Grab	0.0455127	N.R.	0.0113782	0.00123007	0.000784701	0.0113782	0.00123007	0.000784701		Hallgren P and Wallberg P. 2015.
Baltic Sea; Germany	MM0803_62,0006LA	N.R.	Receiving Marine water	Grab	0.0390506	N.R.	0.00976264	0.00105542	0.000673285	0.00976264	0.00105542	0.000673285		Hallgren P and Wallberg P. 2015.
Baltic Sea; Germany	MM0803_54,0006LA	N.R.	Receiving Marine water	Grab	0.036262	N.R.	0.00906549	0.000980053	0.000625206	0.00906549	0.000980053	0.000625206		Hallgren P and Wallberg P. 2015.
Baltic Sea; Germany	MM0803_60,0006LA	N.R.	Receiving Marine water	Grab	0.034276	N.R.	0.008569	0.000926378	0.000590965	0.008569	0.000926378	0.000590965		Hallgren P and Wallberg P. 2015.
Baltic Sea; Germany	MM0803_65B,0006LA	N.R.	Receiving Marine water	Grab	0.0314874	N.R.	0.00787185	0.000851011	0.000542886	0.00787185	0.000851011	0.000542886		Hallgren P and Wallberg P. 2015.
Baltic Sea; Germany	MM0803_65A,0006LA	N.R.	Receiving Marine water	Grab	0.0301085	N.R.	0.00752714	0.000813744	0.000519113	0.00752714	0.000813744	0.000519113		Hallgren P and Wallberg P. 2015.
Baltic Sea; Germany	MM0803_605,0006LA	N.R.	Receiving Marine water	Grab	0.0298822	N.R.	0.00747054	0.000807626	0.00051521	0.00747054	0.000807626	0.00051521		Hallgren P and Wallberg P. 2015.
Estonia	Tallinna reoveepuhasti suublapiirkond	2012-05-26	Receiving Marine water	Routine	<50	50	12.5	1.35135	0.862069	6.25	0.675676	0.431034		Estonian Environment Agency's environmental monitoring database KESE. As of 15/08/2022
Estonia	Kohtla-Järve reoveepuhasti väljalask	2012-05-26	Receiving Marine water	Routine	<50	50	12.5	1.35135	0.862069	6.25	0.675676	0.431034		Estonian Environment Agency's environmental monitoring database KESE. As of 15/08/2022
Estonia	Pärnu reoveepuhasti suublapiirkond 1	2012-05-26	Receiving Marine water	Routine	<50	50	12.5	1.35135	0.862069	6.25	0.675676	0.431034		Estonian Environment Agency's environmental monitoring database KESE. As of 15/08/2022
Estonia	Haapsalu reoveepuhasti suublapiirkond	2012-05-27	Receiving Marine water	Routine	<50	50	12.5	1.35135	0.862069	6.25	0.675676	0.431034		Estonian Environment Agency's environmental monitoring database KESE. As of 15/08/2022
Estonia	Kuressaare reoveepuhasti suublapiirkond	2012-05-27	Receiving Marine water	Routine	<50	50	12.5	1.35135	0.862069	6.25	0.675676	0.431034		Estonian Environment Agency's environmental monitoring database KESE. As of 15/08/2022
Estonia	Kohtla-Järve reoveepuhasti väljalask	2012-09-01	Receiving Marine water	Routine	<50	50	12.5	1.35135	0.862069	6.25	0.675676	0.431034		Estonian Environment Agency's environmental monitoring database KESE. As of 15/08/2022
Estonia	Tallinna reoveepuhasti suublapiirkond	2012-09-01	Receiving Marine water	Routine	<50	50	12.5	1.35135	0.862069	6.25	0.675676	0.431034		Estonian Environment Agency's environmental monitoring database KESE. As of 15/08/2022
Estonia	Pärnu reoveepuhasti suublapiirkond 2	2012-09-01	Receiving Marine water	Routine	<50	50	12.5	1.35135	0.862069	6.25	0.675676	0.431034		Estonian Environment Agency's environmental monitoring database KESE. As of 15/08/2022
Estonia	Haapsalu reoveepuhasti suublapiirkond	2012-09-02	Receiving Marine water	Routine	<50	50	12.5	1.35135	0.862069	6.25	0.675676	0.431034		Estonian Environment Agency's environmental monitoring database KESE. As of 15/08/2022
Estonia	Kuressaare reoveepuhasti suublapiirkond	2012-09-02	Receiving Marine water	Routine	<50	50	12.5	1.35135	0.862069	6.25	0.675676	0.431034		Estonian Environment Agency's environmental monitoring database KESE. As of 15/08/2022
Estonia	Haapsalu laht: HL1 (SUSE, FYKE, FYPLA)	2018-09-05 10:30:00	Receiving Marine water	Routine	<39	39	9.75	1.05405	0.672414	4.875	0.527027	0.336207		Estonian Environment Agency's environmental monitoring database KESE. As of 15/08/2022
Estonia	Väinameri: V35 (SUSE, FYKE, FYPLA)	2019-08-07 11:50:00	Receiving Marine water	Routine	<39	39	9.75	1.05405	0.672414	4.875	0.527027	0.336207		Estonian Environment Agency's environmental monitoring database KESE. As of 15/08/2022
Estonia	Väinameri: V15 (SUSE, FYKE, FYPLA)	2019-08-07 14:15:00	Receiving Marine water	Routine	<39	39	9.75	1.05405	0.672414	4.875	0.527027	0.336207		Estonian Environment Agency's environmental monitoring database KESE. As of 15/08/2022
Estonia	Kassari-Õunaku laht: KS8 (SUSE, FYKE, FYPLA)	2019-08-07 14:30:00	Receiving Marine water	Routine	<39	39	9.75	1.05405	0.672414	4.875	0.527027	0.336207		Estonian Environment Agency's environmental monitoring database KESE. As of 15/08/2022
Estonia	Muuga-Tallinna-Kakumäe laht: T36 (SUSE)	2019-08-12 14:00:00	Receiving Marine water	Routine	<39	39	9.75	1.05405	0.672414	4.875	0.527027	0.336207		Estonian Environment Agency's environmental monitoring database KESE. As of 15/08/2022
Estonia	Muuga-Tallinna-Kakumäe laht: 2 (SUSE, FYKE, FYPLA, ZOOPLA)	2019-08-12 14:50:00	Receiving Marine water	Routine	<39	39	9.75	1.05405	0.672414	4.875	0.527027	0.336207		Estonian Environment Agency's environmental monitoring database KESE. As of 15/08/2022
Estonia	Muuga-Tallinna-Kakumäe laht: 57a (SUSE, FYKE, FYPLA, ZOOPLA)	2019-08-12 15:50:00	Receiving Marine water	Routine	<39	39	9.75	1.05405	0.672414	4.875	0.527027	0.336207		Estonian Environment Agency's environmental monitoring database KESE. As of 15/08/2022
Estonia	Muuga-Tallinna-Kakumäe laht: 3 (SUSE, FYKE, FYPLA, ZOOPLA)	2019-08-13 14:50:00	Receiving Marine water	Routine	<39	39	9.75	1.05405	0.672414	4.875	0.527027	0.336207		Estonian Environment Agency's environmental monitoring database KESE. As of 15/08/2022
Estonia	Pärnu laht: AUDF (FYKE)	2019-10-15 12:20:00	Receiving Marine water	Routine	<39	39	9.75	1.05405	0.672414	4.875	0.527027	0.336207		Estonian Environment Agency's environmental monitoring database KESE. As of 15/08/2022
Estonia	Soela väin: S1 (SUSE, FYKE, FYPLA)	2019-10-16 10:40:00	Receiving Marine water	Routine	<39	39	9.75	1.05405	0.672414	4.875	0.527027	0.336207		Estonian Environment Agency's environmental monitoring database KESE. As of 15/08/2022
Estonia	Narva-Kunda laht: 12c (SUSE, FYKE, FYPLA, ZOOPLA)	2020-07-08 16:10:00	Receiving Marine water	Routine	<40	40	10	1.08108	0.689655	5	0.540541	0.344828		Estonian Environment Agency's environmental monitoring database KESE. As of 15/08/2022
Estonia	Narva-Kunda laht: N8 (SUSE, FYKE, FYPLA, ZOOPLA)	2020-07-09 11:00:00	Receiving Marine water	Routine	<40	40	10	1.08108	0.689655	5	0.540541	0.344828		Estonian Environment Agency's environmental monitoring database KESE. As of 15/08/2022
Estonia	Kolga laht: 18a (SUSE, FYKE, FYPLA)	2020-07-14 12:33:00	Receiving Marine water	Routine	<40	40	10	1.08108	0.689655	5	0.540541	0.344828		Estonian Environment Agency's environmental monitoring database KESE. As of 15/08/2022
Estonia	Hara laht: HR50 (SUSE, FYKE, FYPLA)	2020-07-14 14:00:00	Receiving Marine water	Routine	<40	40	10	1.08108	0.689655	5	0.540541	0.344828		Estonian Environment Agency's environmental monitoring database KESE. As of 15/08/2022
Estonia	Eru-Käsmu laht: RK24 (SUSE, MAFY+SUSE)	2020-07-14 15:05:00	Receiving Marine water	Routine	<40	40	10	1.08108	0.689655	5	0.540541	0.344828		Estonian Environment Agency's environmental monitoring database KESE. As of 15/08/2022
Estonia	Muuga-Tallinna-Kakumäe laht: 3 (SUSE, FYKE, FYPLA, ZOOPLA)	2021-07-13	Receiving Marine water	Routine	<40	40	10	1.08108	0.689655	5	0.540541	0.344828		Estonian Environment Agency's environmental monitoring database KESE. As of 15/08/2022
Estonia	Muuga-Tallinna-Kakumäe laht: 2 (SUSE, FYKE, FYPLA, ZOOPLA)	2021-07-13 17:30:00	Receiving Marine water	Routine	<40	40	10	1.08108	0.689655	5	0.540541	0.344828		Estonian Environment Agency's environmental monitoring database KESE. As of 15/08/2022
Estonia	Muuga-Tallinna-Kakumäe laht: T36 (SUSE)	2021-07-14 11:40:00	Receiving Marine water	Routine	<40	40	10	1.08108	0.689655	5	0.540541	0.344828		Estonian Environment Agency's environmental monitoring database KESE. As of 15/08/2022
Estonia	Muuga-Tallinna-Kakumäe laht: 57a (SUSE, FYKE, FYPLA, ZOOPLA)	2021-07-14 12:40:00	Receiving Marine water	Routine	<40	40	10	1.08108	0.689655	5	0.540541	0.344828		Estonian Environment Agency's environmental monitoring database KESE. As of 15/08/2022
Estonia	Kihelkonna laht: SL1 (SUSE, FYKE, FYPLA)	2021-08-17	Receiving Marine water	Routine	<40	40	10	1.08108	0.689655	5	0.540541	0.344828		Estonian Environment Agency's environmental monitoring database KESE. As of 15/08/2022
Estonia	Matsalu laht: MKIK (FYKE)	2021-08-31 16:00:00	Receiving Marine water	Routine	<40	40	10	1.08108	0.689655	5	0.540541	0.344828		Estonian Environment Agency's environmental monitoring database KESE. As of 15/08/2022
Estonia	Kihelkonna laht: SL3 (SUSE, FYKE, FYPLA)	2021-09-09 19:50:00	Receiving Marine water	Routine	<40	40	10	1.08108	0.689655	5	0.540541	0.344828		Estonian Environment Agency's environmental monitoring database KESE. As of 15/08/2022
Estonia	Väinameri: V35 (SUSE, FYKE, FYPLA)	2021-09-10 10:45:00	Receiving Marine water	Routine	<40	40	10	1.08108	0.689655	5	0.540541	0.344828		Estonian Environment Agency's environmental monitoring database KESE. As of 15/08/2022
Germany	Emshörn	Q1; 2010	Receiving Marine water	Routine	<10	10	2.5	0.27027	0.172414	1.25	0.135135	0.0862069	Measurements were carried out to get an overview concerning the concentration levels in fresh water and marine water in Lower Saxony	Niedersächsischer Landesbetrieb für Wasserwirtschaft, Küsten- und Naturschutz. 2022.
Germany	Norderney	Q1; 2010	Receiving Marine water	Routine	<10	10	2.5	0.27027	0.172414	1.25	0.135135	0.0862069		Niedersächsischer Landesbetrieb für Wasserwirtschaft, Küsten- und Naturschutz. 2022.
Germany	Otzumer Balje	Q1; 2010	Receiving Marine water	Routine	<10	10	2.5	0.27027	0.172414	1.25	0.135135	0.0862069		Niedersächsischer Landesbetrieb für Wasserwirtschaft, Küsten- und Naturschutz. 2022.
Germany	Arngast	Q1; 2010	Receiving Marine water	Routine	<10	10	2.5	0.27027	0.172414	1.25	0.135135	0.0862069		Niedersächsischer Landesbetrieb für Wasserwirtschaft, Küsten- und Naturschutz. 2022.
Germany	Alte Weser	Q1; 2010	Receiving Marine water	Routine	<10	10	2.5	0.27027	0.172414	1.25	0.135135	0.0862069		Niedersächsischer Landesbetrieb für Wasserwirtschaft, Küsten- und Naturschutz. 2022.
Germany	Scharhörn	Q1; 2010	Receiving Marine water	Routine	<10	10	2.5	0.27027	0.172414	1.25	0.135135	0.0862069		Niedersächsischer Landesbetrieb für Wasserwirtschaft, Küsten- und Naturschutz. 2022.
Germany	Emshörn	Q2; 2010	Receiving Marine water	Routine	<10	10	2.5	0.27027	0.172414	1.25	0.135135	0.0862069		Niedersächsischer Landesbetrieb für Wasserwirtschaft, Küsten- und Naturschutz. 2022.
Germany	Norderney	Q2; 2010	Receiving Marine water	Routine	<10	10	2.5	0.27027	0.172414	1.25	0.135135	0.0862069		Niedersächsischer Landesbetrieb für Wasserwirtschaft, Küsten- und Naturschutz. 2022.
Germany	Otzumer Balje	Q2; 2010	Receiving Marine water	Routine	<10	10	2.5	0.27027	0.172414	1.25	0.135135	0.0862069		Niedersächsischer Landesbetrieb für Wasserwirtschaft, Küsten- und Naturschutz. 2022.
Germany	Arngast	Q2; 2010	Receiving Marine water	Routine	<10	10	2.5	0.27027	0.172414	1.25	0.135135	0.0862069		Niedersächsischer Landesbetrieb für Wasserwirtschaft, Küsten- und Naturschutz. 2022.
Germany	Alte Weser	Q2; 2010	Receiving Marine water	Routine	<10	10	2.5	0.27027	0.172414	1.25	0.135135	0.0862069		Niedersächsischer Landesbetrieb für Wasserwirtschaft, Küsten- und Naturschutz. 2022.
Germany	Scharhörn	Q2; 2010	Receiving Marine water	Routine	<10	10	2.5	0.27027	0.172414	1.25	0.135135	0.0862069		Niedersächsischer Landesbetrieb für Wasserwirtschaft, Küsten- und Naturschutz. 2022.
Germany	Emshörn	Q3; 2010	Receiving Marine water	Routine	<10	10	2.5	0.27027	0.172414	1.25	0.135135	0.0862069		Niedersächsischer Landesbetrieb für Wasserwirtschaft, Küsten- und Naturschutz. 2022.
Germany	Norderney	Q3; 2010	Receiving Marine water	Routine	<10	10	2.5	0.27027	0.172414	1.25	0.135135	0.0862069		Niedersächsischer Landesbetrieb für Wasserwirtschaft, Küsten- und Naturschutz. 2022.
Germany	Otzumer Balje	Q3; 2010	Receiving Marine water	Routine	<10	10	2.5	0.27027	0.172414	1.25	0.135135	0.0862069		Niedersächsischer Landesbetrieb für Wasserwirtschaft, Küsten- und Naturschutz. 2022.
Germany	Arngast	Q3; 2010	Receiving Marine water	Routine	<10	10	2.5	0.27027	0.172414	1.25	0.135135	0.0862069		Niedersächsischer Landesbetrieb für Wasserwirtschaft, Küsten- und Naturschutz. 2022.
Germany	Alte Weser	Q3; 2010	Receiving Marine water	Routine	<10	10	2.5	0.27027	0.172414	1.25	0.135135	0.0862069		Niedersächsischer Landesbetrieb für Wasserwirtschaft, Küsten- und Naturschutz. 2022.
Germany	Scharhörn	Q3; 2010	Receiving Marine water	Routine	<10	10	2.5	0.27027	0.172414	1.25	0.135135	0.0862069		Niedersächsischer Landesbetrieb für Wasserwirtschaft, Küsten- und Naturschutz. 2022.
Iceland	ISCW_0008	2018-08-27	Coastal Water	Routine	<1	1	0.25	0.027027	0.0172414	0.125	0.0135135	0.00862069		EEA. 2025
Ireland	Nore Estuary at Inistiogue	2016-09-05	Receiving Estuary	Routine	12	4	3	0.324324	0.206897	3	0.324324	0.206897		Irish EPA. 2022
Ireland	Nore Estuary at Inistiogue	2017-10-09	Receiving Estuary	Routine	<10	10	2.5	0.27027	0.172414	1.25	0.135135	0.0862069		Irish EPA. 2022
Latvia	40A	2017-11-01	Receiving Marine	Grab	<40	40	10	1.08108	0.689655	5	0.540541	0.344828		Latvian Environment Agency. 2019.
Latvia	119	2017-11-05	Receiving Marine	Grab	<40	40	10	1.08108	0.689655	5	0.540541	0.344828		Latvian Environment Agency. 2019.
Malta	MTWL06-1	2017-05-16	Coastal water	Routine	<5	5	1.25	0.135135	0.0862069	0.625	0.0675676	0.0431034		EEA. 2025
Malta	MTWL01-1	2017-05-16	Coastal water	Routine	<5	5	1.25	0.135135	0.0862069	0.625	0.0675676	0.0431034		EEA. 2025
Spain	ESE-OI15	2016-08-30	Estuarine Water	Routine	109	3.3	27.25	2.94595	1.87931	27.25	2.94595	1.87931	Dissolved concentration	EEA. 2025
Spain	ESE-OI15	2016-09-26	Estuarine Water	Routine	42	3.3	10.5	1.13514	0.724138	10.5	1.13514	0.724138	Dissolved concentration	EEA. 2025
Spain	ESE-OI20	2016-08-30	Estuarine Water	Routine	5.2	3.3	1.3	0.140541	0.0896552	1.3	0.140541	0.0896552	Dissolved concentration	EEA. 2025
Spain	ESL-UR20	2016-08-30	Coastal Water	Routine	240	3.3	60	6.48649	4.13793	60	6.48649	4.13793	Dissolved concentration	EEA. 2025
Spain	ESL-UR20	2016-09-26	Coastal Water	Routine	79	3.3	19.75	2.13514	1.36207	19.75	2.13514	1.36207	Dissolved concentration	EEA. 2025
Black Sea	NPMS UA - 2	2016-05-17	Receiving Marine water	Routine	<0.6	0.6	0.15	0.0162162	0.0103448	0.075	0.00810811	0.00517241	Station depth [m]: 18.5	Environmental Monitoring in the Black Sea. 2025.
Black Sea	NPMS UA - 5	2016-05-18	Receiving Marine water	Routine	<0.6	0.6	0.15	0.0162162	0.0103448	0.075	0.00810811	0.00517241	Station depth [m]: 20.5	Environmental Monitoring in the Black Sea. 2025.
Black Sea	NPMS UA - 7	2016-05-19	Receiving Marine water	Routine	<0.6	0.6	0.15	0.0162162	0.0103448	0.075	0.00810811	0.00517241	Station depth [m]: 20.5	Environmental Monitoring in the Black Sea. 2025.
Black Sea	NPMS UA - 8	2016-05-19	Receiving Marine water	Routine	<0.6	0.6	0.15	0.0162162	0.0103448	0.075	0.00810811	0.00517241	Station depth [m]: 52	Environmental Monitoring in the Black Sea. 2025.
Black Sea	NPMS UA - 11	2016-05-20	Receiving Marine water	Routine	<0.6	0.6	0.15	0.0162162	0.0103448	0.075	0.00810811	0.00517241	Station depth [m]: 30	Environmental Monitoring in the Black Sea. 2025.
Black Sea	NPMS UA - 12	2016-05-20	Receiving Marine water	Routine	<0.6	0.6	0.15	0.0162162	0.0103448	0.075	0.00810811	0.00517241	Station depth [m]: 16.3	Environmental Monitoring in the Black Sea. 2025.
Black Sea	NPMS UA - 13	2016-05-21	Receiving Marine water	Routine	<0.6	0.6	0.15	0.0162162	0.0103448	0.075	0.00810811	0.00517241	Station depth [m]: 13.3	Environmental Monitoring in the Black Sea. 2025.
Black Sea	NPMS UA - 14	2016-05-21	Receiving Marine water	Routine	<0.6	0.6	0.15	0.0162162	0.0103448	0.075	0.00810811	0.00517241	Station depth [m]: 13	Environmental Monitoring in the Black Sea. 2025.
Black Sea	NPMS UA - 15	2016-05-21	Receiving Marine water	Routine	<0.6	0.6	0.15	0.0162162	0.0103448	0.075	0.00810811	0.00517241	Station depth [m]: 19	Environmental Monitoring in the Black Sea. 2025.
Black Sea	NPMS GE - 1	2016-05-28	Receiving Marine water	Routine	<0.6	0.6	0.15	0.0162162	0.0103448	0.075	0.00810811	0.00517241	Station depth [m]: 46	Environmental Monitoring in the Black Sea. 2025.
Black Sea	NPMS GE - 2	2016-05-28	Receiving Marine water	Routine	<0.6	0.6	0.15	0.0162162	0.0103448	0.075	0.00810811	0.00517241	Station depth [m]: 76	Environmental Monitoring in the Black Sea. 2025.
Black Sea	NPMS GE - 3	2016-05-31	Receiving Marine water	Routine	<0.6	0.6	0.15	0.0162162	0.0103448	0.075	0.00810811	0.00517241	Station depth [m]: 22	Environmental Monitoring in the Black Sea. 2025.
Black Sea	NPMS GE - 4	2016-05-31	Receiving Marine water	Routine	<0.6	0.6	0.15	0.0162162	0.0103448	0.075	0.00810811	0.00517241	Station depth [m]: 32	Environmental Monitoring in the Black Sea. 2025.
Black Sea	NPMS GE - 5	2016-05-28	Receiving Marine water	Routine	<0.6	0.6	0.15	0.0162162	0.0103448	0.075	0.00810811	0.00517241	Station depth [m]: 677	Environmental Monitoring in the Black Sea. 2025.
Black Sea	NPMS GE - 7	2016-05-30	Receiving Marine water	Routine	<0.6	0.6	0.15	0.0162162	0.0103448	0.075	0.00810811	0.00517241	Station depth [m]: 63	Environmental Monitoring in the Black Sea. 2025.
Black Sea	NPMS GE - 8	2016-05-30	Receiving Marine water	Routine	<0.6	0.6	0.15	0.0162162	0.0103448	0.075	0.00810811	0.00517241	Station depth [m]: 42	Environmental Monitoring in the Black Sea. 2025.
Black Sea	NPMS GE - 9	2016-05-30	Receiving Marine water	Routine	<0.6	0.6	0.15	0.0162162	0.0103448	0.075	0.00810811	0.00517241	Station depth [m]: 93	Environmental Monitoring in the Black Sea. 2025.
Black Sea	NPMS GE - 10	2016-05-30	Receiving Marine water	Routine	<0.6	0.6	0.15	0.0162162	0.0103448	0.075	0.00810811	0.00517241	Station depth [m]: 167	Environmental Monitoring in the Black Sea. 2025.
Black Sea	NPMS GE - 11	2016-05-29	Receiving Marine water	Routine	<0.6	0.6	0.15	0.0162162	0.0103448	0.075	0.00810811	0.00517241	Station depth [m]: 38	Environmental Monitoring in the Black Sea. 2025.
Black Sea	NPMS GE - 12	2016-05-30	Receiving Marine water	Routine	<0.6	0.6	0.15	0.0162162	0.0103448	0.075	0.00810811	0.00517241	Station depth [m]: 280	Environmental Monitoring in the Black Sea. 2025.
Black Sea	NPMS GE - 13	2016-05-29	Receiving Marine water	Routine	<0.6	0.6	0.15	0.0162162	0.0103448	0.075	0.00810811	0.00517241	Station depth [m]: 40	Environmental Monitoring in the Black Sea. 2025.
Black Sea	NPMS GE - 14	2016-05-29	Receiving Marine water	Routine	<0.6	0.6	0.15	0.0162162	0.0103448	0.075	0.00810811	0.00517241	Station depth [m]: 440	Environmental Monitoring in the Black Sea. 2025.
Black Sea	NPMS GE - 15	2016-05-29	Receiving Marine water	Routine	<0.6	0.6	0.15	0.0162162	0.0103448	0.075	0.00810811	0.00517241	Station depth [m]: 440	Environmental Monitoring in the Black Sea. 2025.
Black Sea	JOSS GE-UA - 1	2016-05-24	Receiving Marine water	Routine	<0.6	0.6	0.15	0.0162162	0.0103448	0.075	0.00810811	0.00517241	Station depth [m]: 1702	Environmental Monitoring in the Black Sea. 2025.
Black Sea	JOSS GE-UA - 2	2016-05-24	Receiving Marine water	Routine	<0.6	0.6	0.15	0.0162162	0.0103448	0.075	0.00810811	0.00517241	Station depth [m]: 1853	Environmental Monitoring in the Black Sea. 2025.
Black Sea	JOSS GE-UA - 9	2016-05-27	Receiving Marine water	Routine	<0.6	0.6	0.15	0.0162162	0.0103448	0.075	0.00810811	0.00517241	Station depth [m]: 1266	Environmental Monitoring in the Black Sea. 2025.
Black Sea	JOSS GE-UA - 10	2016-05-27	Receiving Marine water	Routine	<0.6	0.6	0.15	0.0162162	0.0103448	0.075	0.00810811	0.00517241	Station depth [m]: 1013	Environmental Monitoring in the Black Sea. 2025.
Black Sea	JOSS GE-UA - 11	2016-05-27	Receiving Marine water	Routine	<0.6	0.6	0.15	0.0162162	0.0103448	0.075	0.00810811	0.00517241	Station depth [m]: 473	Environmental Monitoring in the Black Sea. 2025.
Black Sea	JOSS GE-UA - 13	2016-06-02	Receiving Marine water	Routine	<0.6	0.6	0.15	0.0162162	0.0103448	0.075	0.00810811	0.00517241	Station depth [m]: 2100	Environmental Monitoring in the Black Sea. 2025.
Black Sea	JOSS GE-UA - 16	2016-06-02	Receiving Marine water	Routine	<0.6	0.6	0.15	0.0162162	0.0103448	0.075	0.00810811	0.00517241	Station depth [m]: 2170	Environmental Monitoring in the Black Sea. 2025.
Black Sea	JOSS GE-UA - 19	2016-06-03	Receiving Marine water	Routine	<0.6	0.6	0.15	0.0162162	0.0103448	0.075	0.00810811	0.00517241	Station depth [m]: 2106	Environmental Monitoring in the Black Sea. 2025.
Black Sea	JOSS GE-UA - 23	2016-06-03	Receiving Marine water	Routine	<0.6	0.6	0.15	0.0162162	0.0103448	0.075	0.00810811	0.00517241	Station depth [m]: 391	Environmental Monitoring in the Black Sea. 2025.
Black Sea	JOSS GE-UA - 25	2016-06-04	Receiving Marine water	Routine	<0.6	0.6	0.15	0.0162162	0.0103448	0.075	0.00810811	0.00517241	Station depth [m]: 60	Environmental Monitoring in the Black Sea. 2025.
Black Sea	JOSS GE-UA - 1	2017-08-28	Receiving Marine water	Routine	<0.182	0.182	0.0455	0.00491892	0.00313793	0.02275	0.00245946	0.00156897	Station depth [m]: 25.3	Environmental Monitoring in the Black Sea. 2025.
Black Sea	JOSS GE-UA - 2	2017-08-29	Receiving Marine water	Routine	<0.182	0.182	0.0455	0.00491892	0.00313793	0.02275	0.00245946	0.00156897	Station depth [m]: 53	Environmental Monitoring in the Black Sea. 2025.
Black Sea	JOSS GE-UA - 3	2017-08-29	Receiving Marine water	Routine	<0.182	0.182	0.0455	0.00491892	0.00313793	0.02275	0.00245946	0.00156897	Station depth [m]: 62	Environmental Monitoring in the Black Sea. 2025.
Black Sea	JOSS GE-UA - 4	2017-08-30	Receiving Marine water	Routine	<0.182	0.182	0.0455	0.00491892	0.00313793	0.02275	0.00245946	0.00156897	Station depth [m]: 1167	Environmental Monitoring in the Black Sea. 2025.
Black Sea	JOSS GE-UA - 5	2017-08-30	Receiving Marine water	Routine	<0.182	0.182	0.0455	0.00491892	0.00313793	0.02275	0.00245946	0.00156897	Station depth [m]: 1926	Environmental Monitoring in the Black Sea. 2025.
Black Sea	JOSS GE-UA - 6	2017-08-31	Receiving Marine water	Routine	<0.182	0.182	0.0455	0.00491892	0.00313793	0.02275	0.00245946	0.00156897	Station depth [m]: 2056	Environmental Monitoring in the Black Sea. 2025.
Black Sea	JOSS GE-UA - 7	2017-08-31	Receiving Marine water	Routine	<0.182	0.182	0.0455	0.00491892	0.00313793	0.02275	0.00245946	0.00156897	Station depth [m]: 2150	Environmental Monitoring in the Black Sea. 2025.
Black Sea	JOSS GE-UA - 8	2017-09-01	Receiving Marine water	Routine	<0.182	0.182	0.0455	0.00491892	0.00313793	0.02275	0.00245946	0.00156897	Station depth [m]: 2132	Environmental Monitoring in the Black Sea. 2025.
Black Sea	JOSS GE-UA - 9	2017-09-01	Receiving Marine water	Routine	<0.182	0.182	0.0455	0.00491892	0.00313793	0.02275	0.00245946	0.00156897	Station depth [m]: 1905	Environmental Monitoring in the Black Sea. 2025.
Black Sea	JOSS GE-UA - 10	2017-09-02	Receiving Marine water	Routine	<0.182	0.182	0.0455	0.00491892	0.00313793	0.02275	0.00245946	0.00156897	Station depth [m]: 1795	Environmental Monitoring in the Black Sea. 2025.
Black Sea	JOSS GE-UA - 11	2017-09-02	Receiving Marine water	Routine	<0.182	0.182	0.0455	0.00491892	0.00313793	0.02275	0.00245946	0.00156897	Station depth [m]: 1540	Environmental Monitoring in the Black Sea. 2025.
Black Sea	JOSS GE-UA - 12	2017-09-03	Receiving Marine water	Routine	<0.182	0.182	0.0455	0.00491892	0.00313793	0.02275	0.00245946	0.00156897	Station depth [m]: 1195	Environmental Monitoring in the Black Sea. 2025.
Black Sea	JOSS GE-UA - 1A	2017-08-26	Receiving Marine water	Routine	3.84	N.R.	0.96	0.103784	0.0662069	0.96	0.103784	0.0662069	Station depth [m]: 22	Environmental Monitoring in the Black Sea. 2025.
Black Sea	JOSS GE-UA - 1A'	2017-08-26	Receiving Marine water	Routine	<0.182	0.182	0.0455	0.00491892	0.00313793	0.02275	0.00245946	0.00156897	Station depth [m]: 23	Environmental Monitoring in the Black Sea. 2025.
Black Sea	JOSS GE-UA - 1C	2017-09-03	Receiving Marine water	Routine	<0.182	0.182	0.0455	0.00491892	0.00313793	0.02275	0.00245946	0.00156897	Station depth [m]: 21	Environmental Monitoring in the Black Sea. 2025.
Black Sea	JOSS-GE-UA - 1GE	2017-09-03	Receiving Marine water	Routine	<0.182	0.182	0.0455	0.00491892	0.00313793	0.02275	0.00245946	0.00156897	Station depth [m]: 0	Environmental Monitoring in the Black Sea. 2025.
Black Sea	JOSS-GE-UA - 2GE	2017-09-03	Receiving Marine water	Routine	2.82	N.R.	0.705	0.0762162	0.0486207	0.705	0.0762162	0.0486207	Station depth [m]: 0	Environmental Monitoring in the Black Sea. 2025.
Black Sea	JOSS-GE-UA - 3GE	2017-09-03	Receiving Marine water	Routine	1.86	N.R.	0.465	0.0502703	0.032069	0.465	0.0502703	0.032069	Station depth [m]: 0	Environmental Monitoring in the Black Sea. 2025.
Black Sea	JOSS GE-UA - CW5	2017-09-05	Receiving Marine water	Routine	<0.182	0.182	0.0455	0.00491892	0.00313793	0.02275	0.00245946	0.00156897	Station depth [m]: 0	Environmental Monitoring in the Black Sea. 2025.
Black Sea	JOSS GE-UA - CW7	2017-09-05	Receiving Marine water	Routine	1.41	N.R.	0.3525	0.0381081	0.0243103	0.3525	0.0381081	0.0243103	Station depth [m]: 0	Environmental Monitoring in the Black Sea. 2025.
Black Sea	JOSS GE-UA - CW8	2017-09-05	Receiving Marine water	Routine	2.63	N.R.	0.6575	0.0710811	0.0453448	0.6575	0.0710811	0.0453448	Station depth [m]: 0	Environmental Monitoring in the Black Sea. 2025.
Black Sea	JBSS GE-UA - 1A	2019-07-28	Receiving Marine water	Routine	<1.25	1.25	0.3125	0.0337838	0.0215517	0.15625	0.0168919	0.0107759	Station depth [m]: 29.05	Environmental Monitoring in the Black Sea. 2025.
Black Sea	JBSS GE-UA - 2A	2019-07-28	Receiving Marine water	Routine	<1.25	1.25	0.3125	0.0337838	0.0215517	0.15625	0.0168919	0.0107759	Station depth [m]: 25.7	Environmental Monitoring in the Black Sea. 2025.
Black Sea	JBSS GE-UA - 3A	2019-07-28	Receiving Marine water	Routine	<1.25	1.25	0.3125	0.0337838	0.0215517	0.15625	0.0168919	0.0107759	Station depth [m]: 21.3	Environmental Monitoring in the Black Sea. 2025.
Black Sea	JBSS GE-UA - 1	2019-07-29	Receiving Marine water	Routine	<1.25	1.25	0.3125	0.0337838	0.0215517	0.15625	0.0168919	0.0107759	Station depth [m]: 27.7	Environmental Monitoring in the Black Sea. 2025.
Black Sea	JBSS GE-UA - 2	2019-07-30	Receiving Marine water	Routine	<1.25	1.25	0.3125	0.0337838	0.0215517	0.15625	0.0168919	0.0107759	Station depth [m]: 50	Environmental Monitoring in the Black Sea. 2025.
Black Sea	JBSS GE-UA - 3	2019-07-30	Receiving Marine water	Routine	<1.25	1.25	0.3125	0.0337838	0.0215517	0.15625	0.0168919	0.0107759	Station depth [m]: 63.5	Environmental Monitoring in the Black Sea. 2025.
Black Sea	JBSS GE-UA - 4	2019-07-30	Receiving Marine water	Routine	<1.25	1.25	0.3125	0.0337838	0.0215517	0.15625	0.0168919	0.0107759	Station depth [m]: 1170	Environmental Monitoring in the Black Sea. 2025.
Black Sea	JBSS GE-UA - 5	2019-07-31	Receiving Marine water	Routine	<1.25	1.25	0.3125	0.0337838	0.0215517	0.15625	0.0168919	0.0107759	Station depth [m]: 1958	Environmental Monitoring in the Black Sea. 2025.
Black Sea	JBSS GE-UA - 6	2019-07-31	Receiving Marine water	Routine	<1.25	1.25	0.3125	0.0337838	0.0215517	0.15625	0.0168919	0.0107759	Station depth [m]: 2108	Environmental Monitoring in the Black Sea. 2025.
Black Sea	JBSS GE-UA - 7	2019-08-01	Receiving Marine water	Routine	<1.25	1.25	0.3125	0.0337838	0.0215517	0.15625	0.0168919	0.0107759	Station depth [m]: 2168.5	Environmental Monitoring in the Black Sea. 2025.
Black Sea	JBSS GE-UA - 8	2019-08-01	Receiving Marine water	Routine	<1.25	1.25	0.3125	0.0337838	0.0215517	0.15625	0.0168919	0.0107759	Station depth [m]: 2168	Environmental Monitoring in the Black Sea. 2025.
Black Sea	JBSS GE-UA - 9	2019-08-02	Receiving Marine water	Routine	<1.25	1.25	0.3125	0.0337838	0.0215517	0.15625	0.0168919	0.0107759	Station depth [m]: 1956	Environmental Monitoring in the Black Sea. 2025.
Black Sea	JBSS GE-UA - 10	2019-08-03	Receiving Marine water	Routine	<1.25	1.25	0.3125	0.0337838	0.0215517	0.15625	0.0168919	0.0107759	Station depth [m]: 1814	Environmental Monitoring in the Black Sea. 2025.
Black Sea	JBSS GE-UA - 11	2019-08-03	Receiving Marine water	Routine	<1.25	1.25	0.3125	0.0337838	0.0215517	0.15625	0.0168919	0.0107759	Station depth [m]: 1544.2	Environmental Monitoring in the Black Sea. 2025.
Black Sea	JBSS GE-UA - 12	2019-08-03	Receiving Marine water	Routine	<1.25	1.25	0.3125	0.0337838	0.0215517	0.15625	0.0168919	0.0107759	Station depth [m]: 1169	Environmental Monitoring in the Black Sea. 2025.
Black Sea	JBSS UA-10	2019-08-04	Receiving Marine water	Routine	<1.25	1.25	0.3125	0.0337838	0.0215517	0.15625	0.0168919	0.0107759	Station depth [m]: 0.2	Environmental Monitoring in the Black Sea. 2025.
Black Sea	JBSS UA-11	2019-08-04	Receiving Marine water	Routine	<1.25	1.25	0.3125	0.0337838	0.0215517	0.15625	0.0168919	0.0107759	Station depth [m]: 0.2	Environmental Monitoring in the Black Sea. 2025.
Black Sea	JBSS UA-15	2019-08-04	Receiving Marine water	Routine	<1.25	1.25	0.3125	0.0337838	0.0215517	0.15625	0.0168919	0.0107759	Station depth [m]: 0.2	Environmental Monitoring in the Black Sea. 2025.
Black Sea	JBSS GE-1	2019-08-07	Receiving Marine water	Routine	<1.25	1.25	0.3125	0.0337838	0.0215517	0.15625	0.0168919	0.0107759	Station depth [m]: 0.2	Environmental Monitoring in the Black Sea. 2025.
Black Sea	JBSS GE-2	2019-08-07	Receiving Marine water	Routine	<1.25	1.25	0.3125	0.0337838	0.0215517	0.15625	0.0168919	0.0107759	Station depth [m]: 0.2	Environmental Monitoring in the Black Sea. 2025.
Black Sea	JBSS GE-4	2019-08-07	Receiving Marine water	Routine	<1.25	1.25	0.3125	0.0337838	0.0215517	0.15625	0.0168919	0.0107759	Station depth [m]: 0.2	Environmental Monitoring in the Black Sea. 2025.
Black Sea	JBSS GE-UA - 1A	2019-07-28	Receiving Marine water	Routine	<0.013	0.013	0.00325	0.000351351	0.000224138	0.001625	0.000175676	0.000112069	Station depth [m]: 29.05	Environmental Monitoring in the Black Sea. 2025.
Black Sea	JBSS GE-UA - 2A	2019-07-28	Receiving Marine water	Routine	<0.013	0.013	0.00325	0.000351351	0.000224138	0.001625	0.000175676	0.000112069	Station depth [m]: 25.7	Environmental Monitoring in the Black Sea. 2025.
Black Sea	JBSS GE-UA - 3A	2019-07-28	Receiving Marine water	Routine	<0.013	0.013	0.00325	0.000351351	0.000224138	0.001625	0.000175676	0.000112069	Station depth [m]: 21.3	Environmental Monitoring in the Black Sea. 2025.
Black Sea	JBSS GE-UA - 1	2019-07-29	Receiving Marine water	Routine	<0.013	0.013	0.00325	0.000351351	0.000224138	0.001625	0.000175676	0.000112069	Station depth [m]: 27.7	Environmental Monitoring in the Black Sea. 2025.
Black Sea	JBSS GE-UA - 2	2019-07-30	Receiving Marine water	Routine	<0.013	0.013	0.00325	0.000351351	0.000224138	0.001625	0.000175676	0.000112069	Station depth [m]: 50	Environmental Monitoring in the Black Sea. 2025.
Black Sea	JBSS GE-UA - 3	2019-07-30	Receiving Marine water	Routine	<0.013	0.013	0.00325	0.000351351	0.000224138	0.001625	0.000175676	0.000112069	Station depth [m]: 63.5	Environmental Monitoring in the Black Sea. 2025.
Black Sea	JBSS GE-UA - 4	2019-07-30	Receiving Marine water	Routine	<0.013	0.013	0.00325	0.000351351	0.000224138	0.001625	0.000175676	0.000112069	Station depth [m]: 1170	Environmental Monitoring in the Black Sea. 2025.
Black Sea	JBSS GE-UA - 5	2019-07-31	Receiving Marine water	Routine	<0.013	0.013	0.00325	0.000351351	0.000224138	0.001625	0.000175676	0.000112069	Station depth [m]: 1958	Environmental Monitoring in the Black Sea. 2025.
Black Sea	JBSS GE-UA - 6	2019-07-31	Receiving Marine water	Routine	<0.013	0.013	0.00325	0.000351351	0.000224138	0.001625	0.000175676	0.000112069	Station depth [m]: 2108	Environmental Monitoring in the Black Sea. 2025.
Black Sea	JBSS GE-UA - 7	2019-08-01	Receiving Marine water	Routine	<0.013	0.013	0.00325	0.000351351	0.000224138	0.001625	0.000175676	0.000112069	Station depth [m]: 2168.5	Environmental Monitoring in the Black Sea. 2025.
Black Sea	JBSS GE-UA - 8	2019-08-01	Receiving Marine water	Routine	<0.013	0.013	0.00325	0.000351351	0.000224138	0.001625	0.000175676	0.000112069	Station depth [m]: 2168	Environmental Monitoring in the Black Sea. 2025.
Black Sea	JBSS GE-UA - 9	2019-08-02	Receiving Marine water	Routine	<0.013	0.013	0.00325	0.000351351	0.000224138	0.001625	0.000175676	0.000112069	Station depth [m]: 1956	Environmental Monitoring in the Black Sea. 2025.
Black Sea	JBSS GE-UA - 10	2019-08-03	Receiving Marine water	Routine	<0.013	0.013	0.00325	0.000351351	0.000224138	0.001625	0.000175676	0.000112069	Station depth [m]: 1814	Environmental Monitoring in the Black Sea. 2025.
Black Sea	JBSS GE-UA - 11	2019-08-03	Receiving Marine water	Routine	<0.013	0.013	0.00325	0.000351351	0.000224138	0.001625	0.000175676	0.000112069	Station depth [m]: 1544.2	Environmental Monitoring in the Black Sea. 2025.
Black Sea	JBSS GE-UA - 12	2019-08-03	Receiving Marine water	Routine	<0.013	0.013	0.00325	0.000351351	0.000224138	0.001625	0.000175676	0.000112069	Station depth [m]: 1169	Environmental Monitoring in the Black Sea. 2025.
Black Sea	JBSS UA-10	2019-08-04	Receiving Marine water	Routine	<0.013	0.013	0.00325	0.000351351	0.000224138	0.001625	0.000175676	0.000112069	Station depth [m]: 0.2	Environmental Monitoring in the Black Sea. 2025.
Black Sea	JBSS UA-11	2019-08-04	Receiving Marine water	Routine	<0.013	0.013	0.00325	0.000351351	0.000224138	0.001625	0.000175676	0.000112069	Station depth [m]: 0.2	Environmental Monitoring in the Black Sea. 2025.
Black Sea	JBSS UA-15	2019-08-04	Receiving Marine water	Routine	<0.013	0.013	0.00325	0.000351351	0.000224138	0.001625	0.000175676	0.000112069	Station depth [m]: 0.2	Environmental Monitoring in the Black Sea. 2025.
Black Sea	JBSS GE-1	2019-08-07	Receiving Marine water	Routine	<0.013	0.013	0.00325	0.000351351	0.000224138	0.001625	0.000175676	0.000112069	Station depth [m]: 0.2	Environmental Monitoring in the Black Sea. 2025.
Black Sea	JBSS GE-2	2019-08-07	Receiving Marine water	Routine	<0.013	0.013	0.00325	0.000351351	0.000224138	0.001625	0.000175676	0.000112069	Station depth [m]: 0.2	Environmental Monitoring in the Black Sea. 2025.
Black Sea	JBSS GE-4	2019-08-07	Receiving Marine water	Routine	<0.013	0.013	0.00325	0.000351351	0.000224138	0.001625	0.000175676	0.000112069	Station depth [m]: 0.2	Environmental Monitoring in the Black Sea. 2025.
Black Sea	JOSS GE-UA - 1	2017-08-28	Receiving Marine water	Routine	<0.63	0.63	0.1575	0.017027	0.0108621	0.07875	0.00851351	0.00543103	Station depth [m]: 25.3	Environmental Monitoring in the Black Sea. 2025.
Black Sea	JOSS GE-UA - 2	2017-08-29	Receiving Marine water	Routine	<0.63	0.63	0.1575	0.017027	0.0108621	0.07875	0.00851351	0.00543103	Station depth [m]: 53	Environmental Monitoring in the Black Sea. 2025.
Black Sea	JOSS GE-UA - 3	2017-08-29	Receiving Marine water	Routine	<0.63	0.63	0.1575	0.017027	0.0108621	0.07875	0.00851351	0.00543103	Station depth [m]: 62	Environmental Monitoring in the Black Sea. 2025.
Black Sea	JOSS GE-UA - 4	2017-08-30	Receiving Marine water	Routine	<0.63	0.63	0.1575	0.017027	0.0108621	0.07875	0.00851351	0.00543103	Station depth [m]: 1167	Environmental Monitoring in the Black Sea. 2025.
Black Sea	JOSS GE-UA - 5	2017-08-30	Receiving Marine water	Routine	<0.63	0.63	0.1575	0.017027	0.0108621	0.07875	0.00851351	0.00543103	Station depth [m]: 1926	Environmental Monitoring in the Black Sea. 2025.
Black Sea	JOSS GE-UA - 6	2017-08-31	Receiving Marine water	Routine	<0.63	0.63	0.1575	0.017027	0.0108621	0.07875	0.00851351	0.00543103	Station depth [m]: 2056	Environmental Monitoring in the Black Sea. 2025.
Black Sea	JOSS GE-UA - 7	2017-08-31	Receiving Marine water	Routine	<0.63	0.63	0.1575	0.017027	0.0108621	0.07875	0.00851351	0.00543103	Station depth [m]: 2150	Environmental Monitoring in the Black Sea. 2025.
Black Sea	JOSS GE-UA - 8	2017-09-01	Receiving Marine water	Routine	<0.63	0.63	0.1575	0.017027	0.0108621	0.07875	0.00851351	0.00543103	Station depth [m]: 2132	Environmental Monitoring in the Black Sea. 2025.
Black Sea	JOSS GE-UA - 9	2017-09-01	Receiving Marine water	Routine	<0.63	0.63	0.1575	0.017027	0.0108621	0.07875	0.00851351	0.00543103	Station depth [m]: 1905	Environmental Monitoring in the Black Sea. 2025.
Black Sea	JOSS GE-UA - 10	2017-09-02	Receiving Marine water	Routine	<0.63	0.63	0.1575	0.017027	0.0108621	0.07875	0.00851351	0.00543103	Station depth [m]: 1795	Environmental Monitoring in the Black Sea. 2025.
Black Sea	JOSS GE-UA - 11	2017-09-02	Receiving Marine water	Routine	<0.63	0.63	0.1575	0.017027	0.0108621	0.07875	0.00851351	0.00543103	Station depth [m]: 1540	Environmental Monitoring in the Black Sea. 2025.
Black Sea	JOSS GE-UA - 12	2017-09-03	Receiving Marine water	Routine	<0.63	0.63	0.1575	0.017027	0.0108621	0.07875	0.00851351	0.00543103	Station depth [m]: 1195	Environmental Monitoring in the Black Sea. 2025.
Black Sea	JOSS-GE-UA - 1GE	2017-09-03	Receiving Marine water	Routine	<0.63	0.63	0.1575	0.017027	0.0108621	0.07875	0.00851351	0.00543103	Station depth [m]: 0	Environmental Monitoring in the Black Sea. 2025.
Black Sea	JOSS-GE-UA - 2GE	2017-09-03	Receiving Marine water	Routine	<0.63	0.63	0.1575	0.017027	0.0108621	0.07875	0.00851351	0.00543103	Station depth [m]: 0	Environmental Monitoring in the Black Sea. 2025.
Black Sea	JOSS-GE-UA - 3GE	2017-09-03	Receiving Marine water	Routine	<0.63	0.63	0.1575	0.017027	0.0108621	0.07875	0.00851351	0.00543103	Station depth [m]: 0	Environmental Monitoring in the Black Sea. 2025.
Black Sea	JOSS GE-UA - 1A	2017-08-26	Receiving Marine water	Routine	<0.63	0.63	0.1575	0.017027	0.0108621	0.07875	0.00851351	0.00543103	Station depth [m]: 22	Environmental Monitoring in the Black Sea. 2025.
Black Sea	JOSS GE-UA - 1C	2017-09-03	Receiving Marine water	Routine	<0.63	0.63	0.1575	0.017027	0.0108621	0.07875	0.00851351	0.00543103	Station depth [m]: 21	Environmental Monitoring in the Black Sea. 2025.
Black Sea	JOSS GE-UA - CW7	2017-09-05	Receiving Marine water	Routine	<0.63	0.63	0.1575	0.017027	0.0108621	0.07875	0.00851351	0.00543103	Station depth [m]: 0	Environmental Monitoring in the Black Sea. 2025.
Black Sea	JOSS GE-UA - CW8	2017-09-05	Receiving Marine water	Routine	<0.63	0.63	0.1575	0.017027	0.0108621	0.07875	0.00851351	0.00543103	Station depth [m]: 0	Environmental Monitoring in the Black Sea. 2025.
Black Sea	JOSS GE-UA - CW5	2017-09-05	Receiving Marine water	Routine	<0.63	0.63	0.1575	0.017027	0.0108621	0.07875	0.00851351	0.00543103	Station depth [m]: 0	Environmental Monitoring in the Black Sea. 2025.
France	Adour - Pilot pontoon	2021-03-29	Receiving Estuary	Grab	2.782	N.R.	0.6955	0.0751892	0.0479655	0.6955	0.0751892	0.0479655		Source : Quadrige - Programme : EMERGENTSEA_POCIS - Saisisseur : Ifremer - RBE - UnitÃ© Contamination Chimique des EcosystÃ¨mes Marins - PrÃ©leveur : Ifremer - RBE - UnitÃ© Contamination Chimique des EcosystÃ¨mes Marins - Analyste : UMR5805-EPOC - Environnements et PalÃ©oenvironnements OcÃ©aniques et Continentaux - UniversitÃ© de Bordeaux 1 - Mise Ã jour du 10/01/2024
Belgium	BEVL_VMM_122	2019-01-09	Receiving Estuary	Routine	77	50	19.25	2.08108	1.32759	19.25	2.08108	1.32759		EEA. 2025
Belgium	BEVL_VMM_122	2019-01-29	Receiving Estuary	Routine	<50	50	12.5	1.35135	0.862069	6.25	0.675676	0.431034		EEA. 2025
Belgium	BEVL_VMM_122	2019-02-21	Receiving Estuary	Routine	<50	50	12.5	1.35135	0.862069	6.25	0.675676	0.431034		EEA. 2025
Belgium	BEVL_VMM_122	2019-03-14	Receiving Estuary	Routine	<50	50	12.5	1.35135	0.862069	6.25	0.675676	0.431034		EEA. 2025
Belgium	BEVL_VMM_122	2019-04-03	Receiving Estuary	Routine	<50	50	12.5	1.35135	0.862069	6.25	0.675676	0.431034		EEA. 2025
Belgium	BEVL_VMM_122	2019-05-02	Receiving Estuary	Routine	71	50	17.75	1.91892	1.22414	17.75	1.91892	1.22414		EEA. 2025
Belgium	BEVL_VMM_122	2019-06-03	Receiving Estuary	Routine	<50	50	12.5	1.35135	0.862069	6.25	0.675676	0.431034		EEA. 2025
Belgium	BEVL_VMM_122	2019-07-09	Receiving Estuary	Routine	<50	50	12.5	1.35135	0.862069	6.25	0.675676	0.431034		EEA. 2025
Belgium	BEVL_VMM_122	2019-08-21	Receiving Estuary	Routine	<50	50	12.5	1.35135	0.862069	6.25	0.675676	0.431034		EEA. 2025
Belgium	BEVL_VMM_122	2019-09-24	Receiving Estuary	Routine	<50	50	12.5	1.35135	0.862069	6.25	0.675676	0.431034		EEA. 2025
Belgium	BEVL_VMM_122	2019-10-15	Receiving Estuary	Routine	56	50	14	1.51351	0.965517	14	1.51351	0.965517		EEA. 2025
Belgium	BEVL_VMM_122	2019-11-20	Receiving Estuary	Routine	79	50	19.75	2.13514	1.36207	19.75	2.13514	1.36207		EEA. 2025
Belgium	BEVL_VMM_162000	2020-01-20	Receiving Estuary	Routine	168	50	42	4.54054	2.89655	42	4.54054	2.89655		EEA. 2025
Belgium	BEVL_VMM_162000	2020-02-17	Receiving Estuary	Routine	128	50	32	3.45946	2.2069	32	3.45946	2.2069		EEA. 2025
Belgium	BEVL_VMM_162000	2020-03-16	Receiving Estuary	Routine	54	50	13.5	1.45946	0.931034	13.5	1.45946	0.931034		EEA. 2025
Belgium	BEVL_VMM_162000	2020-04-06	Receiving Estuary	Routine	109	50	27.25	2.94595	1.87931	27.25	2.94595	1.87931		EEA. 2025
Belgium	BEVL_VMM_162000	2020-05-11	Receiving Estuary	Routine	<50	50	12.5	1.35135	0.862069	6.25	0.675676	0.431034		EEA. 2025
Belgium	BEVL_VMM_162000	2020-06-08	Receiving Estuary	Routine	<50	50	12.5	1.35135	0.862069	6.25	0.675676	0.431034		EEA. 2025
Belgium	BEVL_VMM_162000	2020-07-13	Receiving Estuary	Routine	<50	50	12.5	1.35135	0.862069	6.25	0.675676	0.431034		EEA. 2025
Belgium	BEVL_VMM_162000	2020-08-10	Receiving Estuary	Routine	<50	50	12.5	1.35135	0.862069	6.25	0.675676	0.431034		EEA. 2025
Belgium	BEVL_VMM_162000	2020-09-07	Receiving Estuary	Routine	<50	50	12.5	1.35135	0.862069	6.25	0.675676	0.431034		EEA. 2025
Belgium	BEVL_VMM_162000	2020-10-19	Receiving Estuary	Routine	56	50	14	1.51351	0.965517	14	1.51351	0.965517		EEA. 2025
Belgium	BEVL_VMM_162000	2020-11-16	Receiving Estuary	Routine	<50	50	12.5	1.35135	0.862069	6.25	0.675676	0.431034		EEA. 2025
Belgium	BEVL_VMM_162000	2020-12-07	Receiving Estuary	Routine	<50	50	12.5	1.35135	0.862069	6.25	0.675676	0.431034		EEA. 2025
Bulgaria	BG2SE90000MS024	2016-10-27	Receiving Estuary	Routine	<1	1	0.25	0.027027	0.0172414	0.125	0.0135135	0.00862069		EEA. 2025
Bulgaria	BG2SE90000MS024	2016-10-31	Receiving Estuary	Routine	<1	1	0.25	0.027027	0.0172414	0.125	0.0135135	0.00862069		EEA. 2025
Bulgaria	BG2SE90000MS024	2016-11-18	Receiving Estuary	Routine	<1	1	0.25	0.027027	0.0172414	0.125	0.0135135	0.00862069		EEA. 2025
Bulgaria	BG2SE90000MS024	2016-11-21	Receiving Estuary	Routine	<1	1	0.25	0.027027	0.0172414	0.125	0.0135135	0.00862069		EEA. 2025
Bulgaria	BG2SE90000MS024	2016-12-02	Receiving Estuary	Routine	4	1	1	0.108108	0.0689655	1	0.108108	0.0689655		EEA. 2025
Bulgaria	BG2SE90000MS024	2016-12-05	Receiving Estuary	Routine	4	1	1	0.108108	0.0689655	1	0.108108	0.0689655		EEA. 2025
Bulgaria	BG2SE90000MS024	2017-01-05	Receiving Estuary	Routine	<1	1	0.25	0.027027	0.0172414	0.125	0.0135135	0.00862069		EEA. 2025
Bulgaria	BG2SE90000MS024	2017-01-09	Receiving Estuary	Routine	<1	1	0.25	0.027027	0.0172414	0.125	0.0135135	0.00862069		EEA. 2025
Bulgaria	BG2SE90000MS024	2017-02-28	Receiving Estuary	Routine	<1	1	0.25	0.027027	0.0172414	0.125	0.0135135	0.00862069		EEA. 2025
Bulgaria	BG2SE90000MS024	2017-03-03	Receiving Estuary	Routine	<1	1	0.25	0.027027	0.0172414	0.125	0.0135135	0.00862069		EEA. 2025
Bulgaria	BG2SE90000MS024	2017-03-19	Receiving Estuary	Routine	<1	1	0.25	0.027027	0.0172414	0.125	0.0135135	0.00862069		EEA. 2025
Bulgaria	BG2SE90000MS024	2017-04-20	Receiving Estuary	Routine	<1	1	0.25	0.027027	0.0172414	0.125	0.0135135	0.00862069		EEA. 2025
Bulgaria	BG2SE90000MS024	2017-05-26	Receiving Estuary	Routine	<1	1	0.25	0.027027	0.0172414	0.125	0.0135135	0.00862069		EEA. 2025
Bulgaria	BG2SE90000MS024	2017-06-27	Receiving Estuary	Routine	<1	1	0.25	0.027027	0.0172414	0.125	0.0135135	0.00862069		EEA. 2025
Bulgaria	BG2SE90000MS024	2017-07-25	Receiving Estuary	Routine	<1	1	0.25	0.027027	0.0172414	0.125	0.0135135	0.00862069		EEA. 2025
Bulgaria	BG2SE90000MS024	2017-08-23	Receiving Estuary	Routine	<1	1	0.25	0.027027	0.0172414	0.125	0.0135135	0.00862069		EEA. 2025
Bulgaria	BG2SE90000MS024	2017-09-08	Receiving Estuary	Routine	<1	1	0.25	0.027027	0.0172414	0.125	0.0135135	0.00862069		EEA. 2025
Bulgaria	BG2SE90000MS024	2019-04-08	Receiving Estuary	Routine	<20	20	5	0.540541	0.344828	2.5	0.27027	0.172414		EEA. 2025
Bulgaria	BG2SE90000MS024	2019-05-13	Receiving Estuary	Routine	<20	20	5	0.540541	0.344828	2.5	0.27027	0.172414		EEA. 2025
Bulgaria	BG2SE90000MS024	2019-06-10	Receiving Estuary	Routine	<20	20	5	0.540541	0.344828	2.5	0.27027	0.172414		EEA. 2025
Bulgaria	BG2SE90000MS024	2019-07-15	Receiving Estuary	Routine	<20	20	5	0.540541	0.344828	2.5	0.27027	0.172414		EEA. 2025
Bulgaria	BG2SE90000MS024	2019-08-05	Receiving Estuary	Routine	<20	20	5	0.540541	0.344828	2.5	0.27027	0.172414		EEA. 2025
Bulgaria	BG2SE90000MS024	2019-09-16	Receiving Estuary	Routine	<20	20	5	0.540541	0.344828	2.5	0.27027	0.172414		EEA. 2025
Bulgaria	BG2SE90000MS024	2019-11-11	Receiving Estuary	Routine	<20	20	5	0.540541	0.344828	2.5	0.27027	0.172414		EEA. 2025
Bulgaria	BG2SE90000MS024	2019-11-25	Receiving Estuary	Routine	<20	20	5	0.540541	0.344828	2.5	0.27027	0.172414		EEA. 2025
Bulgaria	BG2SE90000MS024	2019-12-09	Receiving Estuary	Routine	56	20	14	1.51351	0.965517	14	1.51351	0.965517		EEA. 2025
Italy	IT017-ION-01-M	2017-07-19	Receiving Marine water	Routine	5	5	1.25	0.135135	0.0862069	1.25	0.135135	0.0862069		EEA. 2025
Italy	IT017-ION-02-M	2017-07-12	Receiving Marine water	Routine	5	5	1.25	0.135135	0.0862069	1.25	0.135135	0.0862069		EEA. 2025
Italy	IT017-ION-03-M	2017-07-13	Receiving Marine water	Routine	5	5	1.25	0.135135	0.0862069	1.25	0.135135	0.0862069		EEA. 2025
Italy	IT017-ION-04-M	2017-07-19	Receiving Marine water	Routine	5	5	1.25	0.135135	0.0862069	1.25	0.135135	0.0862069		EEA. 2025
Italy	IT017-ION-05-M	2017-07-19	Receiving Marine water	Routine	5	5	1.25	0.135135	0.0862069	1.25	0.135135	0.0862069		EEA. 2025
Italy	IT20B061CA	2018-03-14	Receiving Marine water	Routine	<5	5	1.25	0.135135	0.0862069	0.625	0.0675676	0.0431034		EEA. 2025
Netherlands	NL81_BOCHTVWTM	2016-05-19	Receiving Estuary	Routine	<10	10	2.5	0.27027	0.172414	1.25	0.135135	0.0862069		EEA. 2025
Netherlands	NL81_BOCHTVWTM	2016-07-28	Receiving Estuary	Routine	<10	10	2.5	0.27027	0.172414	1.25	0.135135	0.0862069		EEA. 2025
Netherlands	NL81_BOCHTVWTM	2017-05-19	Receiving Estuary	Routine	<10	10	2.5	0.27027	0.172414	1.25	0.135135	0.0862069		EEA. 2025
Netherlands	NL81_BOCHTVWTM	2017-09-19	Receiving Estuary	Routine	<10	10	2.5	0.27027	0.172414	1.25	0.135135	0.0862069		EEA. 2025
Netherlands	NL89_VLISSGBISSVH	2016-05-18	Receiving Estuary	Routine	<10	10	2.5	0.27027	0.172414	1.25	0.135135	0.0862069		EEA. 2025
Netherlands	NL89_VLISSGBISSVH	2016-08-11	Receiving Estuary	Routine	<10	10	2.5	0.27027	0.172414	1.25	0.135135	0.0862069		EEA. 2025
Netherlands	NL89_VLISSGBISSVH	2018-12-06	Receiving Estuary	Routine	<10	10	2.5	0.27027	0.172414	1.25	0.135135	0.0862069		EEA. 2025
Key
RCR >1
RCR < 1
a Samples <LOD set to the LOD
b Samples <LOD set to 0.5*LoD

## Sheet: References
Citation	Reference
EEA. 2025	[EEA] European Environment Agency. 2025. Water Information System for Europe (WISE) State of the Environment (SoE). https://discodata.eea.europa.eu/#
Environmental Monitoring in the Black Sea. 2025.	Environmental Monitoring in the Black Sea. 2025. Black Sea Environmental Data Platform (BS e-DataPlatform). https://database.blackseadb.org/
Estonian Environment Agency's environmental monitoring database KESE. As of 15/08/2022	Estonian Environment Agency's environmental monitoring database KESE. As of 15/08/2022
Hallgren P and Wallberg P. 2015.	Hallgren P, Wallberg P. 2015. Background report on pharmaceutical concentrations and effects in the Baltic Sea. Policy Area Hazards of the EU Strategy for the Baltic Sea Region. Swedish Environmental Protection Agency, Stockholm, Sweden.
Irish EPA. 2022	(Irish) EPA. 2022. Catchments.ie.; https://creativecommons.org/licenses/by/4.0/
Latvian Environment Agency. 2019.	Latvian Environment Agency. 2019. data of Latvian Environment, Geology and Meteorology Centre
Niedersächsischer Landesbetrieb für Wasserwirtschaft, Küsten- und Naturschutz. 2022.	Niedersächsischer Landesbetrieb für Wasserwirtschaft, Küsten- und Naturschutz. 2022. Diclofenac monitoring data obtained 18/08/2022. Data License Germany - Attribution - Version 2.0
Source : Quadrige - Programme : EMERGENTSEA_POCIS - Saisisseur : Ifremer - RBE - UnitÃ© Contamination Chimique des EcosystÃ¨mes Marins - PrÃ©leveur : Ifremer - RBE - UnitÃ© Contamination Chimique des EcosystÃ¨mes Marins - Analyste : UMR5805-EPOC - Environnements et PalÃ©oenvironnements OcÃ©aniques et Continentaux - UniversitÃ© de Bordeaux 1 - Mise Ã jour du 10/01/2024	Surval. 2025. Access to marine and coastal environmental data; https://surval.ifremer.fr/Donnees/Donnees-par-parametre#/map. Source : Quadrige - Programme : EMERGENTSEA_POCIS. Etalab's Open License V2.0.
